# Supplementary material
Source: PubMed Central journal article supplement (PMC7138661)
Supplement: nxz306_supplemental_file.pdf [file nxz306_supplemental_file.pdf]

Comparison of four methods to assess the prevalence of use and estimates of nutrient intakes from dietary supplements among U.S. adults  
Cowan AE et al.

Online Supplementary Material

Supplemental Table 1. Prevalence (%) of dietary supplement (DS) use among U.S. adult supplement users ( $\geq 19$ y), estimated from those who reported DS intakes on  $\geq 1$  24HR but not on the DSMQ, by type of DS taken, NHANES 2011-2014<sup>1,2</sup>

|                                    | <i>n</i><br>reporting<br>DS | DS Use Reported on $\geq 1$ 24HR Only <sup>3</sup> |            | Mentions of DS on $\geq 1$ 24HR Only |                                            |                                        |                                      |
|------------------------------------|-----------------------------|----------------------------------------------------|------------|--------------------------------------|--------------------------------------------|----------------------------------------|--------------------------------------|
|                                    |                             | <i>n</i>                                           | % (SE)     | <i>m</i> <sup>4</sup>                | Exact/Probable/<br>Generic<br><i>m</i> (%) | Reasonable/<br>Default<br><i>m</i> (%) | No Match/<br>Unknown<br><i>m</i> (%) |
| Any Supplement                     | 6150                        | 561                                                | 8.8 (0.4)  | 1349                                 | 539 (40.0%)                                | 745 (55.2%)                            | 65 (4.8%)                            |
| <i>Type of supplement</i>          |                             |                                                    |            |                                      |                                            |                                        |                                      |
| MVM <sup>5</sup>                   | 3553                        | 371                                                | 10.3 (0.6) | 340                                  | 140 (41.2%)                                | 200 (58.8%)                            | --                                   |
| Multivitamin <sup>6</sup>          | 531                         | 87                                                 | 16.1 (2.1) | 45                                   | 20 (44.4%)                                 | 25 (55.6%)                             | --                                   |
| Multimineral <sup>6</sup>          | 197                         | 34                                                 | 17.9 (3.2) | 9                                    | 5 (55.6%)                                  | 4 (44.4%)                              | --                                   |
| Calcium and Vitamin D <sup>7</sup> | 802                         | 139                                                | 17.0 (2.1) | 60                                   | 20 (33.3%)                                 | 40 (66.7%)                             | --                                   |
| Single Vitamin                     | 2711                        | 281                                                | 10.2 (0.6) | 270                                  | 136 (50.4%)                                | 134 (49.6%)                            | --                                   |
| Single Mineral                     | 1089                        | 175                                                | 14.8 (1.6) | 124                                  | 60 (48.4%)                                 | 64 (51.6%)                             | --                                   |

Abbreviations: MVM, Multivitamin-mineral; DSMQ, Dietary Supplement and Prescription Medication Questionnaire; 24HR, 24-hour dietary recall; SE, standard error.

<sup>1</sup> The analytic sample used in this table reflects the  $n=561$  non-pregnant, non-lactating U.S. adults who report DS use on  $\geq 1$  24HR, but not on the DSMQ. These individuals had complete information for the DSMQ and  $\geq 1$  24HR dietary recall.

<sup>2</sup> Estimated prevalence of DS use on the DSMQ, 24HR Day 1, or 24HR Day 2 was constructed based on whether the participant responded “yes” to the question “Have you used or taken any vitamins, minerals or other dietary supplements in the past 30 days?” or “All day yesterday, [day], between midnight and midnight, did [you/SP] take any vitamins, minerals, herbals or other dietary supplements?” respectively.

<sup>3</sup> Estimated prevalence of DS use among DS users only, as defined in footnote #2.

<sup>4</sup> “*m*” is the number (unweighted) of “mentions” of each product.

<sup>5</sup> MVMs are categorized as DS containing  $\geq 3$  vitamins and  $\geq 1$  mineral.

<sup>6</sup> Multivitamins and multiminerals are categorized as non-MVM DS products containing  $\geq 2$  vitamins or minerals, respectively.

<sup>7</sup> Calcium and vitamin D are categorized as non-MVM DS products containing calcium and vitamin D, which may contain other vitamins/minerals.

Comparison of four methods to assess the prevalence of use and estimates of nutrient intakes from dietary supplements among U.S. adults  
 Cowan AE et al.  
 Online Supplementary Material

Supplemental Table 2. Estimated number of mentions of dietary supplements (DS) used during a given 30-day period as reported on the DSMQ and the percent of those on at least one 24 hour recall by type of DS taken, among U.S. adult supplement users ( $\geq 19$ y) with 2 days of 24HR (n=8881), NHANES 2011-2014<sup>1-3</sup>

| <i>Type of supplement</i>          | <i>1-9 d. of use</i>  |      |           | <i>10-19 d. of use</i> |      |           | <i>20-24 d. of use</i> |     |           | <i>25-29 d. of use</i> |     |           | <i>30 d. of use</i>   |      |           |
|------------------------------------|-----------------------|------|-----------|------------------------|------|-----------|------------------------|-----|-----------|------------------------|-----|-----------|-----------------------|------|-----------|
|                                    | <i>m</i> <sup>4</sup> | %    | % on 24HR | <i>m</i> <sup>4</sup>  | %    | % on 24HR | <i>m</i> <sup>4</sup>  | %   | % on 24HR | <i>m</i> <sup>4</sup>  | %   | % on 24HR | <i>m</i> <sup>4</sup> | %    | % on 24HR |
| MVM <sup>5</sup>                   | 348                   | 12.7 | 44.3      | 360                    | 13.1 | 51.9      | 193                    | 7.0 | 68.9      | 155                    | 5.6 | 83.2      | 1695                  | 61.6 | 89.4      |
| Multivitamin <sup>6</sup>          | 55                    | 13.1 | 41.8      | 52                     | 12.4 | 46.2      | 25                     | 6.0 | 68.0      | 19                     | 4.5 | 79.0      | 269                   | 64.1 | 85.9      |
| Multimineral <sup>6</sup>          | 22                    | 14.7 | 50.0      | 17                     | 11.3 | 35.3      | 11                     | 7.3 | 63.6      | 8                      | 5.3 | 87.5      | 92                    | 61.3 | 91.3      |
| Calcium and Vitamin D <sup>7</sup> | 34                    | 6.2  | 55.9      | 45                     | 8.2  | 64.4      | 43                     | 7.8 | 74.4      | 22                     | 4.0 | 90.9      | 405                   | 73.8 | 93.3      |
| Single Vitamin                     | 360                   | 13.7 | 36.7      | 266                    | 10.1 | 51.1      | 144                    | 5.5 | 63.9      | 84                     | 3.2 | 70.2      | 1778                  | 67.6 | 78.5      |
| Single Mineral                     | 73                    | 9.6  | 31.5      | 86                     | 11.3 | 43.0      | 36                     | 4.7 | 47.2      | 28                     | 3.7 | 67.9      | 540                   | 70.8 | 72.4      |

Abbreviations: MVM, Multivitamin-mineral; DSMQ, Dietary Supplement Questionnaire.

<sup>1</sup>The analytic sample includes individuals  $\geq 19$ y who were not pregnant or lactating and had complete information for the DSMQ, and reported DS intakes  $> 0$  on the DSMQ. The unweighted estimates in this table are reported at the product level for select product types where U.S. adults reported intakes on the DSMQ.

<sup>2</sup> Estimated prevalence of DS use on the DSMQ was constructed based on whether the participant responded “yes” to the question “Have you used or taken any vitamins, minerals or other dietary supplements in the past 30 days?”

<sup>3</sup> Estimated prevalence of DS use among DS users only, as defined in footnote #2.

<sup>4</sup> “m” is the number (unweighted) of “mentions” of each product.

<sup>5</sup> MVMs are categorized as DS containing  $\geq 3$  vitamins and  $\geq 1$  mineral.

<sup>6</sup> Multivitamins and multimineral are categorized as non-MVM DS products containing  $\geq 2$  vitamins or minerals, respectively.

<sup>7</sup> Calcium and vitamin D are categorized as a non-MVM DS products containing calcium and vitamin D, which may contain other vitamins/mineral
